# Supplementary material
Source: MDPI journal article supplement (https://www.mdpi.com/2073-4360/7/12/1538)
Supplement: s1 [file s1]

# Supplementary Materials: Preparation of the Water-Soluble Pyrene-Containing Fluorescent Polymer by One-Pot Method

Xiaomeng Li, Miaomiao Wang, Haijian Tan, Qingmin Yang, Aiqing Wang, Libin Bai, Hongchi Zhao and Yonggang Wu

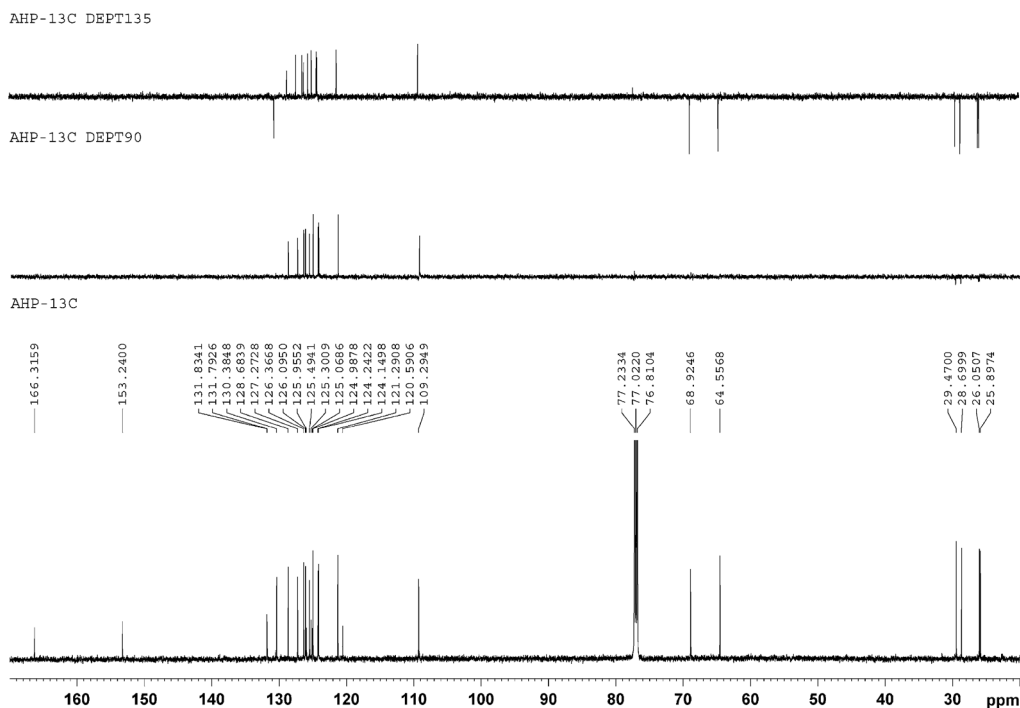

Figure S1.  $^{13}\text{C}$ ,  $^{13}\text{C}$  DEPT90 and  $^{13}\text{C}$  DEPT135 NMR spectra of AHP in  $\text{CDCl}_3$ .

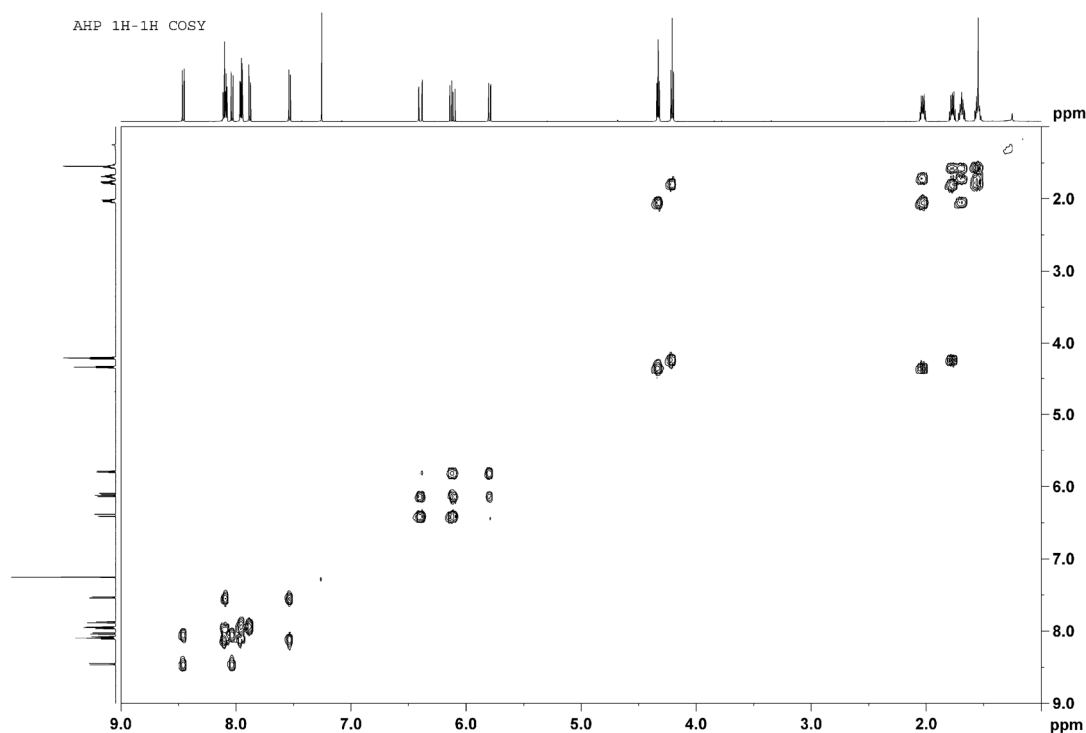

Figure S2.  $^1\text{H}$ - $^1\text{H}$  COSY NMR spectra of AHP in  $\text{CDCl}_3$ .

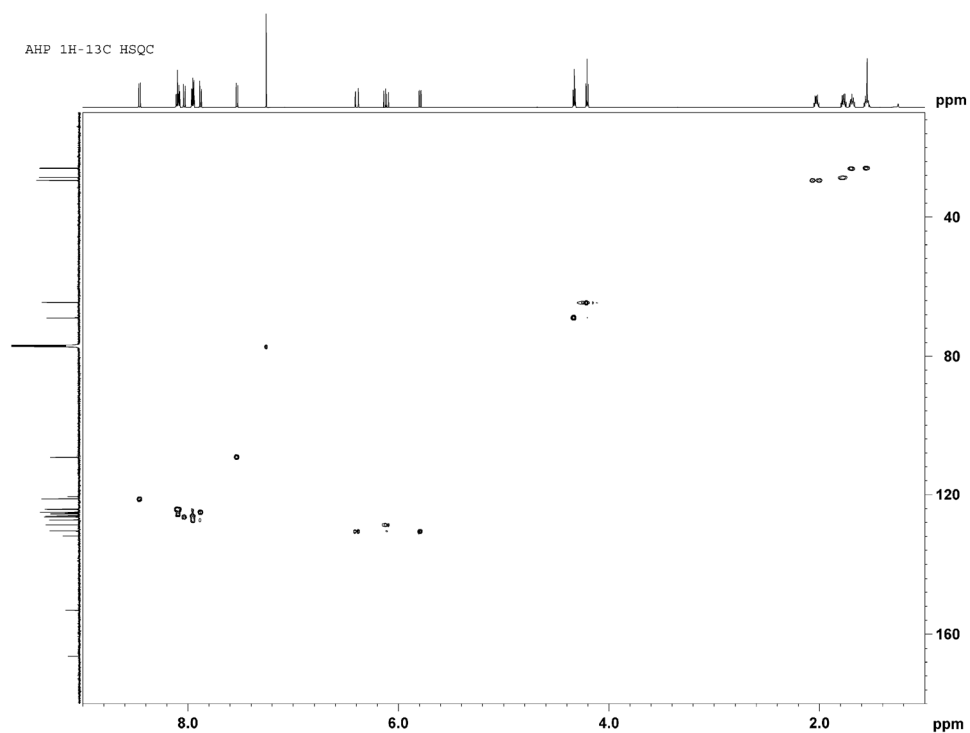

**Figure S3.**  $^1\text{H}$ - $^{13}\text{C}$  HSQC NMR spectra of AHP in  $\text{CDCl}_3$ .

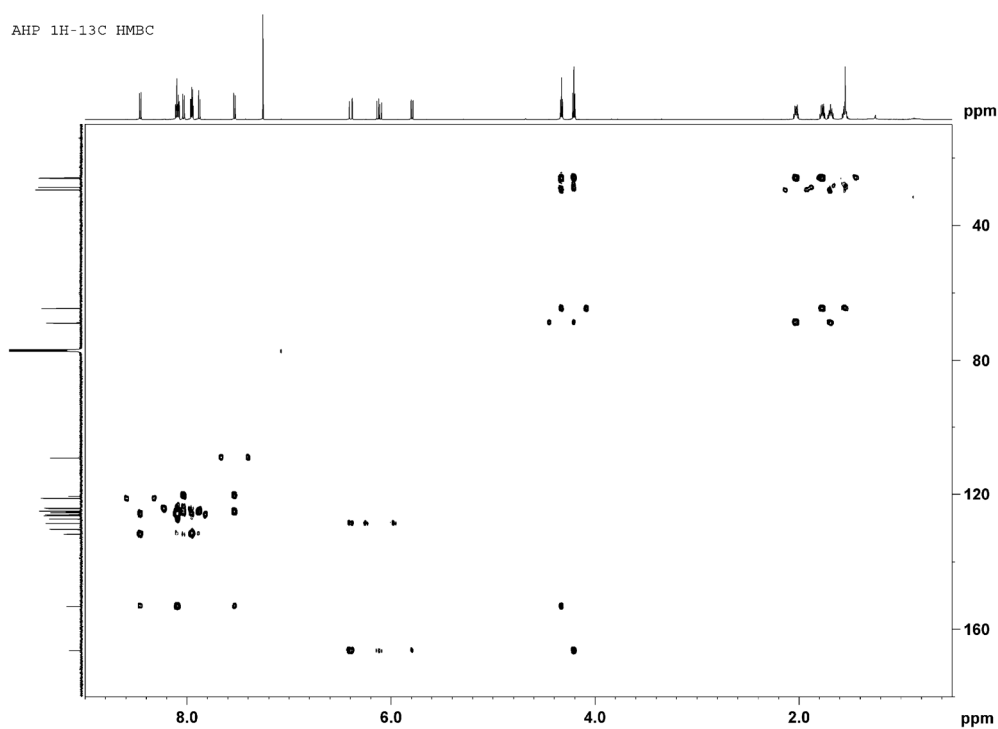

**Figure S4.**  $^1\text{H}$ - $^{13}\text{C}$  HMBC NMR spectra of AHP in  $\text{CDCl}_3$ .

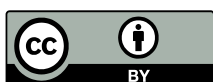

© 2015 by the authors; licensee MDPI, Basel, Switzerland. This article is an open access article distributed under the terms and conditions of the Creative Commons by Attribution (CC-BY) license (<http://creativecommons.org/licenses/by/4.0/>).
